# Supplementary material for: Interventions to Reduce Adult Nursing Turnover: A Systematic Review of Systematic Reviews
Source: PubMed Central journal article supplement (PMC5725565; doi:10.2174/1874434601711010108), 2017-08-15
Supplement: TONURSJ-11-108_SD1.pdf [file TONURSJ-11-108_SD1.pdf]

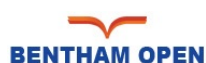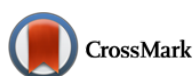

# The Open Nursing Journal

## Supplementary Material

Content list available at: [www.benthamopen.com/TONURSJ/](http://www.benthamopen.com/TONURSJ/)

DOI: 10.2174/1874434601711010108

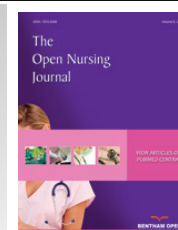

## Interventions to Reduce Adult Nursing Turnover: A Systematic Review of Systematic Reviews

Mary Halter<sup>1,\*</sup>, Ferruccio Pelone<sup>2</sup>, Olga Boiko<sup>1</sup>, Carole Beighton<sup>1</sup>, Ruth Harris<sup>3</sup>, Julia Gale<sup>1</sup>, Stephen Gourlay<sup>4</sup> and Vari Drennan<sup>1</sup>

<sup>1</sup>Faculty of Health, Social Care and Education, Kingston University and St George's, University of London, London, England

<sup>2</sup>National Guideline Alliance, Royal College of Obstetricians and Gynaecologists, London, England

<sup>3</sup>Nursing & Midwifery, King's College London, England

<sup>4</sup>Faculty of Business & Law, Kingston University, London, England

Received: March 20, 2017

Revised: May 22, 2017

Accepted: June 08, 2017

### SUPPLEMENTARY FILE 1

#### Adult Nurse Turnover: OVERVIEW Search Strategies for Individual Databases on Interventions

##### Supplementary Table 1. EMBASE (OVID): Database inception-2015, searched on February 2015.

| #  | Searches                                                                                                                                                                                                                                              | Results |
|----|-------------------------------------------------------------------------------------------------------------------------------------------------------------------------------------------------------------------------------------------------------|---------|
| 1  | exp Nursing Staff/                                                                                                                                                                                                                                    | 37048   |
| 2  | exp Nursing Care/                                                                                                                                                                                                                                     | 11887   |
| 3  | exp Nurses/                                                                                                                                                                                                                                           | 88351   |
| 4  | (nurse or nurses or nursing).tw.                                                                                                                                                                                                                      | 232423  |
| 5  | 1 or 2 or 3 or 4                                                                                                                                                                                                                                      | 273819  |
| 6  | exp Personnel Turnover/                                                                                                                                                                                                                               | 45244   |
| 7  | (turnover or (leave adj3 (nurse or nurses or nursing)) or (leaving adj3 (nurse or nurses or nursing)) or (retention adj3 (nurse or nurses or nursing)) or (retain adj3 (nurse or nurses or nursing)) or (stay adj3 (nurse or nurses or nursing))).tw. | 57080   |
| 8  | 6 or 7                                                                                                                                                                                                                                                | 100754  |
| 9  | Personnel Management/ and (incentive* or intervention* or strateg*).tw.                                                                                                                                                                               | 4235    |
| 10 | workload/ and (incentive* or intervention* or strateg*).tw.                                                                                                                                                                                           | 3293    |
| 11 | Burnout, Professional/ and (incentive* or intervention* or strateg*).tw.                                                                                                                                                                              | 1563    |
| 12 | Job Satisfaction/ and (incentive* or intervention* or strateg*).tw.                                                                                                                                                                                   | 2328    |
| 13 | ((burnout or stress) adj3 (incentive* or intervention* or strateg*).tw.                                                                                                                                                                               | 3027    |
| 14 | ((work or working or workload) adj3 (incentive* or intervention* or strateg*).tw.                                                                                                                                                                     | 4731    |
| 15 | (organi?ation* adj3 (incentive* or intervention* or strateg*).tw.                                                                                                                                                                                     | 2972    |
| 16 | ((economic* or financial or pay*) adj3 (incentive* or intervention* or strateg*).tw.                                                                                                                                                                  | 6640    |
| 17 | 9 or 10 or 11 or 12 or 13 or 14 or 15 or 16                                                                                                                                                                                                           | 25594   |
| 18 | 5 and 8 and 17                                                                                                                                                                                                                                        | 1817    |
| 19 | exp nursing staff/                                                                                                                                                                                                                                    | 37048   |
| 20 | exp nursing care/                                                                                                                                                                                                                                     | 11887   |
| 21 | exp nurse/                                                                                                                                                                                                                                            | 88351   |
| 22 | (nurse or nurses or nursing).tw.                                                                                                                                                                                                                      | 232423  |
| 23 | 19 or 20 or 21 or 22                                                                                                                                                                                                                                  | 273819  |
| 24 | Personnel Turnover.mp.                                                                                                                                                                                                                                | 46      |

Suppl. Table 1 contd.....

| #  | Searches                                                                                                                                                                                                                                                                                  | Results |
|----|-------------------------------------------------------------------------------------------------------------------------------------------------------------------------------------------------------------------------------------------------------------------------------------------|---------|
| 25 | *personnel management/ or exp health care personnel management/ or exp personnel shortage/                                                                                                                                                                                                | 20535   |
| 26 | ((turnover adj5 (nurse or nurses or nursing)) or (leave adj5 (nurse or nurses or nursing)) or (leaving adj5 (nurse or nurses or nursing)) or (retention adj5 (nurse or nurses or nursing)) or (retain adj5 (nurse or nurses or nursing)) or (stay adj5 (nurse or nurses or nursing))).tw. | 3045    |
| 27 | Job Satisfaction/ and (turnover* or leave or leaving or retention or retain or stay or staying).tw.                                                                                                                                                                                       | 2568    |
| 28 | Burnout/ and (turnover* or leave or leaving or retention or retain or stay or staying).tw.                                                                                                                                                                                                | 770     |
| 29 | Personnel Management/ and (turnover* or leave or leaving or retention or retain or stay or staying).tw.                                                                                                                                                                                   | 3226    |
| 30 | Workload/ and (turnover* or leave or leaving or retention or retain or stay or staying).tw.                                                                                                                                                                                               | 1486    |
| 31 | ((burnout or morale or stress) adj5 (turnover* or leave or leaving or retention or retain or stay or staying)).tw.                                                                                                                                                                        | 1280    |
| 32 | ((economic* or financial or pay*) adj5 (turnover* or leave or leaving or retention or retain or stay or staying)).tw.                                                                                                                                                                     | 1064    |
| 33 | (job satisfaction adj5 (turnover* or leave or leaving or retention or retain or stay or staying)).tw.                                                                                                                                                                                     | 517     |
| 34 | ((work or working or workload) adj5 (turnover* or leave or leaving or retention or retain or stay or staying)).tw.                                                                                                                                                                        | 2781    |
| 35 | (organi?ation* adj5 (turnover* or leave or leaving or retention or retain or stay or staying)).tw.                                                                                                                                                                                        | 715     |
| 36 | 24 or 25 or 26 or 27 or 28 or 29 or 30 or 31 or 32 or 33 or 34 or 35                                                                                                                                                                                                                      | 30348   |
| 37 | Meta-Analysis as Topic/                                                                                                                                                                                                                                                                   | 17217   |
| 38 | meta analy\$.tw.                                                                                                                                                                                                                                                                          | 86493   |
| 39 | metaanaly\$.tw.                                                                                                                                                                                                                                                                           | 4528    |
| 40 | Meta-Analysis/                                                                                                                                                                                                                                                                            | 83196   |
| 41 | (systematic adj (review\$1 or overview\$1)).tw.                                                                                                                                                                                                                                           | 73971   |
| 42 | exp Review Literature as Topic/                                                                                                                                                                                                                                                           | 24995   |
| 43 | cochrane.ab.                                                                                                                                                                                                                                                                              | 40451   |
| 44 | embase.ab.                                                                                                                                                                                                                                                                                | 39177   |
| 45 | (psychlit or psyclit).ab.                                                                                                                                                                                                                                                                 | 928     |
| 46 | (psychinfo or psycinfo).ab.                                                                                                                                                                                                                                                               | 9560    |
| 47 | (cinahl or cinhal).ab.                                                                                                                                                                                                                                                                    | 12351   |
| 48 | science citation index.ab.                                                                                                                                                                                                                                                                | 2171    |
| 49 | bids.ab.                                                                                                                                                                                                                                                                                  | 384     |
| 50 | cancerlit.ab.                                                                                                                                                                                                                                                                             | 635     |
| 51 | 37 or 38 or 39 or 40 or 41 or 42                                                                                                                                                                                                                                                          | 197027  |
| 52 | 43 or 44 or 45 or 46 or 47 or 48 or 49 or 50                                                                                                                                                                                                                                              | 63878   |
| 53 | reference list\$.ab.                                                                                                                                                                                                                                                                      | 10908   |
| 54 | bibliograph\$.ab.                                                                                                                                                                                                                                                                         | 12740   |
| 55 | hand-search\$.ab.                                                                                                                                                                                                                                                                         | 4842    |
| 56 | relevant journals.ab.                                                                                                                                                                                                                                                                     | 848     |
| 57 | manual search\$.ab.                                                                                                                                                                                                                                                                       | 2831    |
| 58 | 53 or 54 or 55 or 56 or 57                                                                                                                                                                                                                                                                | 28725   |
| 59 | selection criteria.ab.                                                                                                                                                                                                                                                                    | 18764   |
| 60 | data extraction.ab.                                                                                                                                                                                                                                                                       | 11832   |
| 61 | 59 or 60                                                                                                                                                                                                                                                                                  | 29444   |
| 62 | Review/                                                                                                                                                                                                                                                                                   | 1545292 |
| 63 | 61 and 62                                                                                                                                                                                                                                                                                 | 15706   |
| 64 | Comment/                                                                                                                                                                                                                                                                                  | 0       |
| 65 | Letter/                                                                                                                                                                                                                                                                                   | 573045  |
| 66 | Editorial/                                                                                                                                                                                                                                                                                | 373456  |
| 67 | 64 or 65 or 66                                                                                                                                                                                                                                                                            | 946333  |
| 68 | 51 or 52 or 58 or 63                                                                                                                                                                                                                                                                      | 230111  |
| 69 | 68 not 67                                                                                                                                                                                                                                                                                 | 219913  |
| 70 | 23 and 36 and 69                                                                                                                                                                                                                                                                          | 190     |
| 71 | limit 70 to english language                                                                                                                                                                                                                                                              | 185     |
| 72 | (incentive* or intervention* or strateg*).tw.                                                                                                                                                                                                                                             | 1318166 |
| 73 | 71 and 72                                                                                                                                                                                                                                                                                 | 79      |
| 74 | limit 73 to english language                                                                                                                                                                                                                                                              | 79      |

**The Cochrane Database of Systematic Reviews: database inception-2015, searched February 2015.**

| #  | Searches                                                                                                                                  | Results |
|----|-------------------------------------------------------------------------------------------------------------------------------------------|---------|
| 1  | intervention:ti,ab,kw (Word variations have been searched)                                                                                | 97723   |
| 2  | incentive*:ti,ab,kw (Word variations have been searched)                                                                                  | 1418    |
| 3  | strateg*:ti,ab,kw (Word variations have been searched)                                                                                    | 29745   |
| 4  | #1 or #2 or #3                                                                                                                            | 117754  |
| 5  | MeSH descriptor: [Nursing Care] explode all trees                                                                                         | 1615    |
| 6  | MeSH descriptor: [Nursing Staff] explode all trees                                                                                        | 529     |
| 7  | nurse:ti,ab,kw or "Nurses":ti,ab,kw or "nursing":ti,ab,kw (Word variations have been searched)                                            | 16270   |
| 8  | #5 or #6 or #7                                                                                                                            | 16294   |
| 9  | MeSH descriptor: [Personnel Turnover] explode all trees                                                                                   | 20      |
| 10 | MeSH descriptor: [Burnout, Professional] explode all trees                                                                                | 134     |
| 11 | MeSH descriptor: [Workload] explode all trees                                                                                             | 321     |
| 12 | MeSH descriptor: [Job Satisfaction] explode all trees                                                                                     | 175     |
| 13 | retain:ti,ab,kw or "retention":ti,ab,kw or "leave":ti,ab,kw or "stay":ti,ab,kw or "staying":ti,ab,kw (Word variations have been searched) | 52436   |
| 14 | #13 and (#9 or #10 or #11 or #12)                                                                                                         | 78      |
| 15 | #14 and #8 and 3                                                                                                                          | 5       |

**CINAHL (EBSCO): Database inception-2015, searched February 2015.**

| #  | Searches                                                                                                                                                                                                                                                                    | Results   |
|----|-----------------------------------------------------------------------------------------------------------------------------------------------------------------------------------------------------------------------------------------------------------------------------|-----------|
| 1  | (MH "Staff Nurses")                                                                                                                                                                                                                                                         | 3 627     |
| 2  | (MH "Nursing Care+")                                                                                                                                                                                                                                                        | 244 145   |
| 3  | (MH "Nurses+")                                                                                                                                                                                                                                                              | 166 259   |
| 4  | (MH "Adult Nurse Practitioners")                                                                                                                                                                                                                                            | 83        |
| 5  | TX (nurse or nurses or nursing)                                                                                                                                                                                                                                             | 1 198 126 |
| 6  | S1 OR S2 OR S3 OR S4 OR S5                                                                                                                                                                                                                                                  | 1 203 824 |
| 7  | TX (turnover N5 (nurse or nurses or nursing)) or (leave N5 (nurse or nurses or nursing)) or (leaving N5 (nurse or nurses or nursing)) or (retention N5 (nurse or nurses or nursing)) or (retain N5 (nurse or nurses or nursing)) or (stay N5 (nurse or nurses or nursing))) | 5 182     |
| 8  | (MH "Personnel Turnover") AND TX ((nurse or nurses or nursing))                                                                                                                                                                                                             | 2 182     |
| 9  | (MH "Job Satisfaction") AND TX (turnover* or leave or leaving or retention or retain or stay or staying)                                                                                                                                                                    | 3 269     |
| 10 | (MH "Burnout, Professional") AND TX (turnover* or leave or leaving or retention or retain or stay or staying)                                                                                                                                                               | 649       |
| 11 | (MH "Workload") AND TX (turnover* or leave or leaving or retention or retain or stay or staying)                                                                                                                                                                            | 959       |
| 12 | TX ((burnout or morale or stress) N5 (turnover* or leave or leaving or retention or retain or stay or staying))                                                                                                                                                             | 637       |
| 13 | TX ((economic* or financial or pay*) N5 (turnover* or leave or leaving or retention or retain or stay or staying))                                                                                                                                                          | 1 863     |
| 14 | TX ("job satisfaction" N5 (turnover* or leave or leaving or retention or retain or stay or staying))                                                                                                                                                                        | 727       |
| 15 | TX ((work or working or workload) N5 (turnover* or leave or leaving or retention or retain or stay or staying))                                                                                                                                                             | 1 839     |
| 16 | TX (organi?ation* N5 (turnover* or leave or leaving or retention or retain or stay or staying))                                                                                                                                                                             | 726       |
| 17 | S7 OR S8 OR S9 OR S10 OR S11 OR S12 OR S13 OR S14 OR S15 OR S16                                                                                                                                                                                                             | 12 404    |
| 18 | TX (incentive* or intervention* or strateg*)                                                                                                                                                                                                                                | 341 467   |
| 19 | (MH "Meta Analysis")                                                                                                                                                                                                                                                        | 21 278    |
| 20 | (MH "Systematic Review")                                                                                                                                                                                                                                                    | 29 650    |
| 21 | PT systematic review                                                                                                                                                                                                                                                        | 47 197    |
| 22 | TX (metaanaly* or meta-analy*)                                                                                                                                                                                                                                              | 31 579    |
| 23 | TX metanal*                                                                                                                                                                                                                                                                 | 26        |
| 24 | PT nursing interventions                                                                                                                                                                                                                                                    | 1 426     |
| 25 | TI (review* or overview*)                                                                                                                                                                                                                                                   | 120 525   |
| 26 | (MH "Literature Review")                                                                                                                                                                                                                                                    | 3 670     |
| 27 | (MH "Literature Searching+")                                                                                                                                                                                                                                                | 6 960     |
| 28 | TX cochrane*                                                                                                                                                                                                                                                                | 23 515    |
| 29 | TX synthes* N3 (literature* or research* or studies or data)                                                                                                                                                                                                                | 5 222     |
| 30 | TX (MEDLINE or medlars or embase or scisearch or psycinfo or psychinfo or psyclit or psychlit)                                                                                                                                                                              | 43 197    |
| 31 | TX pooled analy*                                                                                                                                                                                                                                                            | 2 523     |
| 32 | TX ((data N2 pool*) and studies)                                                                                                                                                                                                                                            | 1 583     |

Contd.....

| #  | Searches                                                                                                                                 | Results   |
|----|------------------------------------------------------------------------------------------------------------------------------------------|-----------|
| 33 | TX ((hand or manual* or database* or computer*) N2 search*)                                                                              | 15 114    |
| 34 | (MH "Reference Databases")                                                                                                               | 2 104     |
| 35 | TX ((electronic* or bibliographic*) N2 (database* or data base*))                                                                        | 4 960     |
| 36 | PT (review or systematic-review or practice-guidelines)                                                                                  | 117 088   |
| 37 | AB (review* or overview*)                                                                                                                | 194 695   |
| 38 | AB (systematic* or methodologic* or quantitativ* or research* or literature* or studies or trial* or effective*)                         | 563 840   |
| 39 | S36 AND S38                                                                                                                              | 48 949    |
| 40 | S36 N10 S38                                                                                                                              | 48 949    |
| 41 | S18 OR S19 OR S20 OR S21 OR S22 OR S23 OR S24 OR S25 OR S26 OR S27 OR S28 OR S29 OR S30 OR S31 OR S32 OR S33 OR S34 OR S35 OR S39 OR S40 | 522 176   |
| 42 | PT editorial                                                                                                                             | 194 451   |
| 43 | PT letter                                                                                                                                | 195 566   |
| 44 | PT case study                                                                                                                            | 263 832   |
| 45 | (MH "record review")                                                                                                                     | 42 948    |
| 46 | (MH "peer review")                                                                                                                       | 4 348     |
| 47 | TX (retrospective* N2 review*)                                                                                                           | 13 968    |
| 48 | TX (case* N2 review*)                                                                                                                    | 10 785    |
| 49 | TX (record* N2 review*)                                                                                                                  | 46 459    |
| 50 | TX (patient* N2 review*)                                                                                                                 | 10 343    |
| 51 | TX (patient* N2 chart*)                                                                                                                  | 2 542     |
| 52 | TX (peer N2 review*)                                                                                                                     | 3 244 495 |
| 53 | TX (chart* N2 review*)                                                                                                                   | 7 200     |
| 54 | TX (case* N2 report*)                                                                                                                    | 51 857    |
| 55 | (MH "Case Control Studies+")                                                                                                             | 50 075    |
| 56 | (MH "Prospective Studies+")                                                                                                              | 254 352   |
| 57 | (MH "case studies)                                                                                                                       | 15 088    |
| 58 | (MH "animal studies)                                                                                                                     | 63 286    |
| 59 | (MH "edit and review")                                                                                                                   | 1 891     |
| 60 | TX (rat* or mouse or mice or hamster* or animal* or dog* or cat* or rabbit* or bovine or sheep)                                          | 704 989   |
| 61 | S42 OR S43 OR S44 OR S45 OR S46 OR S47 OR S48 OR S49 OR S50 OR S51 OR S52 OR S53 OR S54 OR S55 OR S56 OR S57 OR S58 OR S59 OR S60        | 3 492 972 |
| 62 | S19 OR S20 OR S21 OR S22 OR S23 OR S24 OR S25 OR S26 OR S27 OR S28 OR S29 OR S30 OR S31 OR S32 OR S33 OR S34 OR S35 OR S39 OR S40        | 222 100   |
| 63 | S61 NOT (S61 AND S62)                                                                                                                    | 3 292 263 |
| 64 | S62 NOT S63                                                                                                                              | 222 100   |
| 65 | S6 AND S17 AND S18 AND S64 Limiters - Language: English                                                                                  | 156       |

**Applied Social Sciences Index and Abstracts –ASSIA (ProQuest XML) – Database inception-2015, searched February 2015.**

| #  | Searches                                                                                                                                                                                                                                                                                                                                                                                                                                                                                                                                                                                                                                                                                                                                                                                                                                                                                                                                                                                                                                                                                                         | Results |
|----|------------------------------------------------------------------------------------------------------------------------------------------------------------------------------------------------------------------------------------------------------------------------------------------------------------------------------------------------------------------------------------------------------------------------------------------------------------------------------------------------------------------------------------------------------------------------------------------------------------------------------------------------------------------------------------------------------------------------------------------------------------------------------------------------------------------------------------------------------------------------------------------------------------------------------------------------------------------------------------------------------------------------------------------------------------------------------------------------------------------|---------|
| S5 | S4 and S3 AND S2 AND S1                                                                                                                                                                                                                                                                                                                                                                                                                                                                                                                                                                                                                                                                                                                                                                                                                                                                                                                                                                                                                                                                                          | 51      |
| S4 | (literature review) OR ti((review OR meta-analysis)) OR ab(review) OR (SU.EXACT("Systematic reviews") OR SU.EXACT("Reviews"))                                                                                                                                                                                                                                                                                                                                                                                                                                                                                                                                                                                                                                                                                                                                                                                                                                                                                                                                                                                    | 52501   |
| S3 | (all(incentive*) or all(intervention*) or all(strateg*))                                                                                                                                                                                                                                                                                                                                                                                                                                                                                                                                                                                                                                                                                                                                                                                                                                                                                                                                                                                                                                                         | 101714  |
| S2 | ((all(leave) NEAR/5 (all(nurse) OR all(nurses) OR all(nursing))) OR (all(leaving) NEAR/5 (all(nurse) or all(nurses) or all(nursing)) OR all(retention) NEAR/5 (all(nurse) or all(nurses) or all(nursing))) OR SU.EXACT.EXPLODE("Turnover")) OR (SU.EXACT.EXPLODE("Burnout") AND (turnover* OR leave OR leaving OR retention OR retain OR stay OR staying)) OR ((turnover* OR leave OR leaving OR retention OR retain OR stay OR staying) AND SU.EXACT.EXPLODE("Job applicants" OR "Job redesign" OR "Personnel management")) OR ((turnover* OR leave OR leaving OR retention OR retain OR stay OR staying) AND SU.EXACT.EXPLODE("Workloads")) OR ((all(burnout) or all(morale) or all(stress)) NEAR/5 (all(turnover*) or all(leave) or all(leaving) or all(retention) or all(retain) or all(stay) or all(staying))) OR ((all(economic*) or all(financial) or all(pay*)) NEAR/5 (all(turnover*) or all(leave) or all(leaving) or all(retention) or all(retain) or all(stay) or all(staying))) OR ((work or working or workload) NEAR/5 (turnover* or leave or leaving or retention or retain or stay or staying)) | 2331    |
| S1 | nurse OR (nurses OR nursing) OR SU.EXACT("Nursing") OR (SU.EXACT("Staff nurses") OR SU.EXACT("Nurses"))                                                                                                                                                                                                                                                                                                                                                                                                                                                                                                                                                                                                                                                                                                                                                                                                                                                                                                                                                                                                          | 66598   |

Scopus: database inception-2015, searched February 2015

| #  | Searches                                                                                                                 | Results |
|----|--------------------------------------------------------------------------------------------------------------------------|---------|
| 1  | TITLE-ABS-KEY (“nurse” or “nurses” or “nursing”)                                                                         | 393865  |
| 2  | TITLE-ABS (“turnover” W/5 “nurse” or “nurses” or “nursing”)                                                              | 1262    |
| 3  | TITLE-ABS (“leave” W/5 “nurse” or “nurses” or “nursing”)                                                                 | 978     |
| 4  | TITLE-ABS (“leaving” W/5 “nurse” or “nurses” or “nursing”)                                                               | 507     |
| 5  | TITLE-ABS (“retention” W/5 “nurse” or “nurses” or “nursing”)                                                             | 2292    |
| 6  | TITLE-ABS (“retain” W/5 “nurse” or “nurses” or “nursing”)                                                                | 616     |
| 7  | TITLE-ABS (“staying” W/5 “nurse” or “nurses” or “nursing”)                                                               | 173     |
| 8  | TITLE-ABS (“stay” W/5 “nurse” or “nurses” or “nursing”)                                                                  | 3267    |
| 10 | TITLE-ABS (“work” W/3 “turnover” or “leave” or “leaving” or “retention” or “retain” or “stay” or “staying”)              | 5623    |
| 11 | TITLE-ABS (“organi?ation” W/5 “turnover” or “leave” or “leaving” or “retention” or “retain” or “stay” or “staying”)      | 3576    |
| 12 | TITLE-ABS (“organi?ational” W/5 “turnover” or “leave” or “leaving” or “retention” or “retain” or “stay” or “staying”)    | 2287    |
| 13 | TITLE-ABS (“pay” W/10 “turnover” or “leave” or “leaving” or “retention” or “retain” or “stay” or “staying”)              | 890     |
| 14 | TITLE-ABS (“financial” W/10 “turnover” or “leave” or “leaving” or “retention” or “retain” or “stay” or “staying”)        | 1568    |
| 15 | TITLE-ABS (“stress” W/10 “turnover” or “leave” or “leaving” or “retention” or “retain” or “stay” or “staying”)           | 4564    |
| 16 | TITLE-ABS (“Workload” W/10 “turnover” or “leave” or “leaving” or “retention” or “retain” or “stay” or “staying”)         | 412     |
| 17 | TITLE-ABS (“Burnout” W/10 “turnover” or “leave” or “leaving” or “retention” or “retain” or “stay” or “staying”)          | 546     |
| 18 | TITLE-ABS (“Job Satisfaction” W/10 “turnover” or “leave” or “leaving” or “retention” or “retain” or “stay” or “staying”) | 1292    |
| 19 | or/2-18                                                                                                                  | 18823   |
| 20 | TITLE-ABS-KEY (“literature review”)                                                                                      | 94620   |
| 21 | TITLE-ABS (“review” OR “meta-analysis”)                                                                                  | 1874148 |
| 22 | TITLE-ABS-KEY (“Systematic review”)                                                                                      | 11,284  |
| 23 | or/20-22                                                                                                                 | 1989869 |
| 24 | TITLE-ABS (“incentive” OR “incentives” OR “intervention” OR “interventions” OR “strategy” OR “strategies”)               | 2182551 |
| 25 | 1 AND 19 AND 23 AND 24                                                                                                   | 210     |

## SUPPLEMENTARY FILE 2

### Adult Nurse Turnover OVERVIEW THEMATIC INDEX\_Interventions

#### Index of Interventions

##### 1. Individual level

Population: the review was focused on those delivering adult nursing (*i.e.* licensed or registered) in health services (both in hospital and community) in developed economies (according to the definition of the International Monetary Fund [25]);

- 1.1. One to one mentorship programmes
- 1.2. Individual strategies
- 1.3. Internships, externships
- 1.4. Transition to speciality practice programs
- 1.5. (Partnership) orientation programs
- 1.6. Bicultural training

##### 2. Leadership Level

- 2.1. Leadership/management training
- 2.2. Supervisor support
- 2.3. Preceptor program

##### 3. Group Level

- 3.1. Residency programmes
- 3.2. Group cohesion
- 3.3. Peer support

- 3.4. Nursing practice models  
3.5. Team-oriented interventions

#### 4. Organisational Level

- 4.1. Family friendly policies

### SUPPLEMENTARY FILE 3

#### Adult Nurse Turnover OVERVIEW Excluded Studies\_ Interventions

Part 1: Full-text articles excluded, with reasons.

Part 2: General characteristics of the excluded *i.e.* no literature review: *e.g.* overview of reviews, reports from any type of primary study reviews (those not including a quality assessment of the included papers).

#### Part 1: Full-text articles excluded, with reasons.

| Reason for exclusion         | References of excluded studies                                                                                                                                                                                                                                                                                                                                                                                                                                                                                                                                                                                                                                                                                                                                                                                                                                                                                                                                                                                                                                                                                                                                                                                                                                                                                                                                                                                                                                                                                                                                                                                                                                                                                                                                                                                                                                                                                                                                                                                                                                                                                                                                                                                                                                                                                                                                                                                                                                                                                                                                                                                                                                                                                                                                                                                                                                                                                                                                                                                                                                                                                                                                                                                                                                                                                                                                                                                                                                                                                                                                                                                                                                                                                                                                                                                                                                                                                                                                                                                                                                                                                                                                                                                                                                                                      |
|------------------------------|-----------------------------------------------------------------------------------------------------------------------------------------------------------------------------------------------------------------------------------------------------------------------------------------------------------------------------------------------------------------------------------------------------------------------------------------------------------------------------------------------------------------------------------------------------------------------------------------------------------------------------------------------------------------------------------------------------------------------------------------------------------------------------------------------------------------------------------------------------------------------------------------------------------------------------------------------------------------------------------------------------------------------------------------------------------------------------------------------------------------------------------------------------------------------------------------------------------------------------------------------------------------------------------------------------------------------------------------------------------------------------------------------------------------------------------------------------------------------------------------------------------------------------------------------------------------------------------------------------------------------------------------------------------------------------------------------------------------------------------------------------------------------------------------------------------------------------------------------------------------------------------------------------------------------------------------------------------------------------------------------------------------------------------------------------------------------------------------------------------------------------------------------------------------------------------------------------------------------------------------------------------------------------------------------------------------------------------------------------------------------------------------------------------------------------------------------------------------------------------------------------------------------------------------------------------------------------------------------------------------------------------------------------------------------------------------------------------------------------------------------------------------------------------------------------------------------------------------------------------------------------------------------------------------------------------------------------------------------------------------------------------------------------------------------------------------------------------------------------------------------------------------------------------------------------------------------------------------------------------------------------------------------------------------------------------------------------------------------------------------------------------------------------------------------------------------------------------------------------------------------------------------------------------------------------------------------------------------------------------------------------------------------------------------------------------------------------------------------------------------------------------------------------------------------------------------------------------------------------------------------------------------------------------------------------------------------------------------------------------------------------------------------------------------------------------------------------------------------------------------------------------------------------------------------------------------------------------------------------------------------------------------------------------------------------|
| Not intervention of interest | <ol style="list-style-type: none"> <li>1. Anderson G, Hair C, Toderò C. Nurse Residency Programs: An Evidence-Based Review of Theory, Process, and Outcomes. <i>Journal of Professional Nursing</i>. 2012;28(4):203-12.</li> <li>2. Attree M, Flinkman M, Howley B, Lakanmaa R-, Lima-Basto M, Uhrenfeldt L. A review of nursing workforce policies in five European countries: Denmark, Finland, Ireland, Portugal and United Kingdom/England. <i>J Nurs Manag</i>. 2011.</li> <li>3. Barlow KM, Zangaro GA. Meta-analysis of the reliability and validity of the Anticipated Turnover Scale across studies of registered nurses in the United States. <i>J Nurs Manag</i>. 2010;18(7):862-73.</li> <li>4. Bott M. Research review. A mentorship program. <i>CANNT Journal</i> 2005;</li> <li>5. Buchan J. Nursing shortages and evidence-based interventions: A case study from Scotland. <i>Int Nurs Rev</i>. 2002;49(4):209-18.</li> <li>6. Butler M, Collins R, Drennan J, Halligan P, O'Mathúna DP, Schultz TJ, <i>et al.</i> Hospital nurse staffing models and patient and staff-related outcomes. <i>Cochrane database of systematic reviews (Online)</i>. 2011(7).</li> <li>7. Chan CW, Perry L. Lifestyle health promotion interventions for the nursing workforce: A systematic review. <i>J Clin Nurs</i>. 2012;21(15-16):2247-61.</li> <li>8. Chang EM, Hancock KM, Johnson A, Daly J, Jackson D. Role stress in nurses: Review of related factors and strategies for moving forward. <i>Nursing and Health Sciences</i>. 2005;7(1):57-65.</li> <li>9. Coomber B, Louise Barriball K. Impact of job satisfaction components on intent to leave and turnover for hospital-based nurses: A review of the research literature. <i>Int J Nurs Stud</i>. 2007;44(2):297-314.</li> <li>10. Crenshaw JT. Use of video-feedback, reflection, and interactive analysis to improve nurse leadership Practices. <i>Nurs Adm Q</i>. 2012;36(3):260-7.</li> <li>11. Edward KL, Hercelinskyj G. Burnout in the caring nurse: learning resilient behaviours. <i>Br J Nurs</i>. 2007;16(4):240-2.</li> <li>12. Flint A, Webster J. Exit interviews to reduce turnover amongst healthcare professionals. <i>The Cochrane database of systematic reviews</i>. 2013;3.</li> <li>13. Frehywot S, Mullan F, Payne PW, Ross H. Compulsory service programmes for recruiting health workers in remote and rural areas: do they work? <i>Bull World Health Organ</i>. 2010 May;88(5):364-70. doi: 10.2471/BLT.09.071605.</li> <li>14. Gazza EA, Hunker DF. Facilitating student retention in online graduate nursing education programs: A review of the literature. <i>Nurse Educ Today</i>. 2014;34(7):1125-9.</li> <li>15. Gilbody S, Cahill J, Barkham M, Richards D, Bee P, Glanville J. Can we improve the morale of staff working in psychiatric units? A systematic review. <i>Journal of Mental Health</i>. 2006;15(1):7-17.</li> <li>16. Gilliss CL, Powell DL, Carter B. Recruiting and retaining a diverse workforce in nursing: From evidence to best practices to policy. <i>Policy, Politics, and Nursing Practice</i>. 2010;11(4):294-301.</li> <li>17. Gonzalez R, Pietsch TT, Kozub K, Cole P, Nifras R, Russell-Headley K, Durhams T, Tomesko J, Wondolowski G. Caring: looking beyond simulations. <i>International Journal for Human Caring</i> 2010;</li> <li>18. Hildebrandt L. Providing grief resolution as an Oncology nurse retention strategy: A literature review. <i>Clin J Oncol Nurs</i>. 2012;16(6):601-6.</li> <li>19. Lobo VM. Transformational leadership to promote cross-generational retention. <i>Nursing leadership (Toronto, Ont.)</i>. 2010;23(2):21-31.</li> <li>20. Nelsey L, Brownie S. Effective leadership, teamwork and mentoring - Essential elements in promoting generational cohesion in the nursing workforce and retaining nurses. <i>Collegian</i>. 2012;19(4):197-202.</li> <li>21. Twigg D, McCullough K. Nurse retention: A review of strategies to create and enhance positive practice environments in clinical settings. <i>Int J Nurs Stud</i>. 2014;51(1):85-92.</li> <li>22. Webster J, Flint A. Exit interviews to reduce turnover amongst healthcare professionals. <i>The Cochrane database of systematic reviews</i>. 2014;8.</li> </ol> |

Part 1 contd....

| Reason for exclusion                                                                                        | References of excluded studies                                                                                                                                                                                                                                                                                                                                                                                                                                                                                                                                                                                                                                                                                                                                                                                                                                                                                                                                                                                                                                                                                                                                                                                                                                                                                                                                                                                                                                                                                                                                                                                                                                                                                                                                                                                                                                                                                                                                                                                                                                                                                                                                                                                                                                                                                                                                                                                                                                                                                                                                                                                                                                                                                                                                                                                                                                                                                                                                                                                                                                                                                       |
|-------------------------------------------------------------------------------------------------------------|----------------------------------------------------------------------------------------------------------------------------------------------------------------------------------------------------------------------------------------------------------------------------------------------------------------------------------------------------------------------------------------------------------------------------------------------------------------------------------------------------------------------------------------------------------------------------------------------------------------------------------------------------------------------------------------------------------------------------------------------------------------------------------------------------------------------------------------------------------------------------------------------------------------------------------------------------------------------------------------------------------------------------------------------------------------------------------------------------------------------------------------------------------------------------------------------------------------------------------------------------------------------------------------------------------------------------------------------------------------------------------------------------------------------------------------------------------------------------------------------------------------------------------------------------------------------------------------------------------------------------------------------------------------------------------------------------------------------------------------------------------------------------------------------------------------------------------------------------------------------------------------------------------------------------------------------------------------------------------------------------------------------------------------------------------------------------------------------------------------------------------------------------------------------------------------------------------------------------------------------------------------------------------------------------------------------------------------------------------------------------------------------------------------------------------------------------------------------------------------------------------------------------------------------------------------------------------------------------------------------------------------------------------------------------------------------------------------------------------------------------------------------------------------------------------------------------------------------------------------------------------------------------------------------------------------------------------------------------------------------------------------------------------------------------------------------------------------------------------------------|
| <p><b>Any review using informal and subjective methods to collect and interpret evidence</b></p>            | <ol style="list-style-type: none"> <li>1. AL-Dossary R, Kitsantas P, Maddox PJ. The impact of residency programs on new nurse graduates' clinical decision-making and leadership skills: A systematic review. <i>Nurse Educ Today</i>. 2014;34(6):1024-8.</li> <li>2. Becker DM. Implementing a night-shift clinical nurse specialist. <i>Clinical Nurse Specialist</i>. 2013;27(1):26-30.</li> <li>3. Cummins A. Clinical supervision: The way forward? A review of the literature. <i>Nurse Education in Practice</i>. 2009;9(3):215-20.</li> <li>4. Force MV. The relationship between effective nurse managers and nursing retention. <i>J Nurs Adm</i>. 2005;35(7-8):336-41.</li> <li>5. Hutchinson D, Brown J, Longworth K. Attracting and maintaining the Y Generation in nursing: A literature review. <i>J Nurs Manag</i>. 2012;20(4):444-50.</li> <li>6. Jackson D, Mannix J, Daly J. Retaining a viable workforce: a critical challenge for nursing. <i>Contemporary nurse: a journal for the Australian nursing profession</i>. 2001;11(2-3):163-72.</li> <li>7. Kleinman CS. Leadership: a key strategy in staff nurse retention. <i>J Contin Educ Nurs</i>. 2004;35(3):128-32.</li> <li>8. McDonald AW, Ward-Smith P. A review of evidence-based strategies to retain graduate nurses in the profession. <i>Journal for Nurses in Staff Development</i>. 2012;28(1):E16-20.</li> <li>9. Mills JE, Francis KL, Bonner A. Mentoring, clinical supervision and preceptorship: clarifying the conceptual definitions for Australian rural nurses. A review of the literature. <i>Rural and remote health</i>. 2005;5(3):410.</li> <li>10. Moseley A, Jeffers L, Paterson J. The retention of the older nursing workforce: A literature review exploring factors that influence the retention and turnover of older nurses. <i>Contemporary Nurse</i>. 2008;30(1):46-56.</li> <li>11. O'Leary KJ, Sehgal NL, Terrell G, Williams MV. Interdisciplinary teamwork in hospitals: A review and practical recommendations for improvement. <i>Journal of Hospital Medicine</i>. 2012;7(1):48-54.</li> <li>12. Smith-Stoner M, Markley J. Home healthcare nurse recruitment and retention: Tips for retaining nurses: One state's experience. <i>Home Healthc Nurse</i>. 2007;25(3):198-205.</li> <li>13. Stichler JF. Healthy work environments for the ageing nursing workforce. <i>J Nurs Manag</i>. 2013;21(7):956-63.</li> <li>14. Storey C, Cheater F, Ford J, Leese B. Retention of nurses in the primary and community care workforce after the age of 50 years: Database analysis and literature review. <i>J Adv Nurs</i>. 2009;65(8):1596-605.</li> <li>15. Whitehead B, Owen P, Holmes D, Beddingham E, Simmons M, Henshaw L, <i>et al</i>. Supporting newly qualified nurses in the UK: A systematic literature review. <i>Nurse Educ Today</i>. 2013;33(4):370-7.</li> <li>16. Willemsen-McBride T. Preceptorship planning is essential to perioperative nursing retention: matching teaching and learning styles. <i>Can Oper Room Nurs J</i>. 2010;28(1):8, 10, 11, 16 <i>passim</i>".</li> </ol> |
| <p><b>Inappropriate study population</b></p>                                                                | <ol style="list-style-type: none"> <li>1. Bärnighausen T, Bloom DE. Financial incentives for return of service in underserved areas: A systematic review. <i>BMC Health Services Research</i>. 2009;9.</li> <li>2. Batcheller J. Chief Nursing Officer Turnover: An Analysis of the Literature. <i>Nurs Clin North Am</i>. 2010;45(1):11-31.</li> <li>3. Brown P, Fraser K, Wong CA, Muise M, Cummings G. Factors influencing intentions to stay and retention of nurse managers: A systematic review. <i>J Nurs Manag</i>. 2013;21(3):459-72.</li> <li>4. Buykx P, Humphreys J, Wakerman J, Pashen D. Systematic review of effective retention incentives for health workers in rural and remote areas: towards evidence-based policy. <i>Aust J Rural Health</i>. 2010;18(3):102-9.</li> <li>5. Fisher KA, Fraser JD. Rural health career pathways: Research themes in recruitment and retention. <i>Australian Health Review</i>. 2010;34(3):292-6.</li> <li>6. Flint A, Webster J. The use of the exit interview to reduce turnover amongst healthcare professionals. <i>Cochrane database of systematic reviews (Online)</i>. 2011;1.</li> <li>7. Gagnon MP, Pollender H, Trépanier A, Duplâa E, Ly BA. Supporting health professionals through information and communication technologies: a systematic review of the effects of information and communication technologies on recruitment and retention. <i>Telemedicine journal and e-health: the official journal of the American Telemedicine Association</i>. 2011;17(4):269-74.</li> <li>8. Suter E, Deutschlander S, Mickelson G, Nurani Z, Lait J, Harrison L, <i>et al</i>. Can interprofessional collaboration provide health human resources solutions? A knowledge synthesis. <i>Journal of Interprofessional Care</i>. 2012;26(4):261-8.</li> <li>9. Varekamp I, Verbeek JHAM, van Dijk FJH. How can we help employees with chronic diseases to stay at work? A review of interventions aimed at job retention and based on an empowerment perspective. <i>Int Arch Occup Environ Health</i>. 2006;80(2):87-97.</li> </ol>                                                                                                                                                                                                                                                                                                                                                                                                                                                                                                                                                                                                                                                                                                                                                                                                                                                                                                                                                                                                                        |
| <p><b>Inappropriate study design (i.e. overview of reviews, reports from any type of primary study)</b></p> | <ol style="list-style-type: none"> <li>1. Chenoweth L, Jeon YH, Merlyn T, Brodaty H. A systematic review of what factors attract and retain nurses in aged and dementia care. <i>J Clin Nurs</i>. 2010;19(1-2):156-67.</li> <li>2. Mbemba G, Gagnon M-, Paré G, Côté J. Interventions for supporting nurse retention in rural and remote areas: An umbrella review. <i>Human Resources for Health</i>. 2013;11(1).</li> <li>3. Tourangeau AE, Thomson H, Cummings G, Cranley LA. Generation-specific incentives and disincentives for nurses to remain employed in acute care hospitals. <i>J Nurs Manag</i>. 2013;21(3):473-82.</li> </ol>                                                                                                                                                                                                                                                                                                                                                                                                                                                                                                                                                                                                                                                                                                                                                                                                                                                                                                                                                                                                                                                                                                                                                                                                                                                                                                                                                                                                                                                                                                                                                                                                                                                                                                                                                                                                                                                                                                                                                                                                                                                                                                                                                                                                                                                                                                                                                                                                                                                                          |
| <p><b>Non peer-reviewed articles (i.e. thesis)</b></p>                                                      | <ol style="list-style-type: none"> <li>1. Wilkes J, Epps. Best practices: Retaining registered nurses 2010, Dissertation</li> </ol>                                                                                                                                                                                                                                                                                                                                                                                                                                                                                                                                                                                                                                                                                                                                                                                                                                                                                                                                                                                                                                                                                                                                                                                                                                                                                                                                                                                                                                                                                                                                                                                                                                                                                                                                                                                                                                                                                                                                                                                                                                                                                                                                                                                                                                                                                                                                                                                                                                                                                                                                                                                                                                                                                                                                                                                                                                                                                                                                                                                  |
| <p><b>Reviews published before 1990</b></p>                                                                 | <ol style="list-style-type: none"> <li>1. Helmer FT, MCKnight P. Management strategies to minimize nursing turnover. <i>Health Care Manage Rev</i>. 1989;14(1):73-80.</li> </ol>                                                                                                                                                                                                                                                                                                                                                                                                                                                                                                                                                                                                                                                                                                                                                                                                                                                                                                                                                                                                                                                                                                                                                                                                                                                                                                                                                                                                                                                                                                                                                                                                                                                                                                                                                                                                                                                                                                                                                                                                                                                                                                                                                                                                                                                                                                                                                                                                                                                                                                                                                                                                                                                                                                                                                                                                                                                                                                                                     |

Part 1 contd....

| Reason for exclusion                                                                                                      | References of excluded studies                                                                                                                                                                       |
|---------------------------------------------------------------------------------------------------------------------------|------------------------------------------------------------------------------------------------------------------------------------------------------------------------------------------------------|
| Reviews not including a quality assessment of the included papers<br>(please see part 2 of this file for further details) | 1. Morphet J, Considine J, McKenna L. Transition to specialty practice programs in emergency nursing - A review of the literature. <i>Australasian Emergency Nursing Journal</i> . 2011; 14(1):45-9. |

**Part 2: General characteristics of the excluded reviews (those not including a quality assessment of the included papers).**

| First Author year | Aim(s)<br>Research question(s)                                                                                                       | Selection criteria used to include primary studies (PICOS)                                                                                                           | Scope<br>1. Geography<br>2. Time limit<br>3. Language       | Type, number, and quality of included studies as reported by the author(s)                                                                                           | Review authors' summary of findings                                                                                                                                                                                            | AMSTAR score                  |
|-------------------|--------------------------------------------------------------------------------------------------------------------------------------|----------------------------------------------------------------------------------------------------------------------------------------------------------------------|-------------------------------------------------------------|----------------------------------------------------------------------------------------------------------------------------------------------------------------------|--------------------------------------------------------------------------------------------------------------------------------------------------------------------------------------------------------------------------------|-------------------------------|
| Morphet 2011      | To present a review of the literature related to Transition to specialty practice programs (TSPPs) with a focus on emergency nursing | <i>P</i> Staff nurses<br><i>I</i> Transition to specialty practice programs (TSPPs)<br><i>C</i> Not stated<br><i>O</i> Retention<br>Attrition<br><i>S</i> Not stated | 1 International (by Australia)<br>2 1990 –2010<br>3 English | Total number* 11<br>Quantitative -<br><i>Experimental (quasi) -</i><br><i>Observational -</i><br>Qualitative -<br>Mix-Methods -<br>Other -<br>*No details available. | Transition to specialty practice programs (TSPPs) which offer elements of extended orientation, education and preceptorship have been successful in recruiting and short-term retention of nursing staff in emergency nursing. | Moderate risk of bias<br>5/11 |

PICOS: Population, Intervention, Comparison, Outcomes, Study design; P: Population; I: Intervention; C: Comparison; O: Outcome; S: Study design

© 2017 Halter et al.

This is an open access article distributed under the terms of the Creative Commons Attribution 4.0 International Public License (CC-BY 4.0), a copy of which is available at: <https://creativecommons.org/licenses/by/4.0/legalcode>. This license permits unrestricted use, distribution, and reproduction in any medium, provided the original author and source are credited.
